# Supplementary material for: Two (3,6)-connected porous metal–organic frameworks based on linear trinuclear [Co3(COO)6] and paddlewheel dinuclear [Cu2(COO)4] SBUs: gas adsorption, photocatalytic behaviour, and magnetic properties
Source: Royal Society of Chemistry journal article supplement (doi:10.1039/c4ta06537a), 2015-01-01
Supplement: c4ta06537a1.pdf [file c4ta06537a1.pdf]

## Electronic Supplementary Information (ESI)

### Two (3,6)-connected porous metal-organic frameworks based on linear trinuclear [Co<sub>3</sub>(COO)<sub>6</sub>] and paddlewheel dinuclear [Cu<sub>2</sub>(COO)<sub>4</sub>] SBUs: gas adsorption, photocatalytic behaviour, and magnetic properties

Jun Zhao,<sup>abc</sup> Wen-Wen Dong,<sup>a</sup> Ya-Pan Wu,<sup>a</sup> Ye-Nan Wang,<sup>a</sup> Chao Wang,<sup>a</sup> Dong-Sheng Li,<sup>\*a</sup> and Qi-Chun Zhang<sup>\*c,d</sup>

<sup>a</sup>College of Materials and Chemical Engineering, Hubei Provincial Collaborative Innovation Center for New Energy Microgrid, China Three Gorges University, Yichang, 443002, P. R. China. E-mail: lidongsheng1@126.com; Tel: +86 717 6397506

<sup>b</sup>State Key Laboratory of Structural Chemistry, Fujian Institute of Research on the Structure of Matter, Chinese Academy of Sciences, Fuzhou, 350002, P. R. China

<sup>c</sup>School of Materials Science and Engineering, Nanyang Technological University, Singapore 639798, Singapore. E-mail: qczhang@ntu.edu.sg; Tel: +65 67904705

<sup>d</sup>Division of Chemistry and Biological Chemistry, School of Physical and Mathematical Sciences, Nanyang Technological University, Singapore 637371 (Singapore)

**Table S1** Selected bond lengths [Å] and angles [°] for compound **1** and **2**.

|                      |            | <b>1</b>             |           |
|----------------------|------------|----------------------|-----------|
| Co(1)-O(1)           | 2.076(3)   | Co(1)-O(1)#1         | 2.076(3)  |
| Co(1)-O(3)#2         | 2.139(3)   | Co(1)-O(3)#3         | 2.139(3)  |
| Co(1)-O(4)#5         | 2.152(3)   | Co(1)-O(4)#4         | 2.152(3)  |
| Co(2)-O(6)#3         | 1.978(4)   |                      |           |
| Co(2)-O(2)           | 2.022(4)   | Co(2)-O(7')          | 2.104(10) |
| Co(2)-O(7)           | 2.106(5)   | Co(2)-N(2)           | 2.124(6)  |
| Co(2)-N(3)#6         | 2.14(4)    | Co(2)-O(4)#4         | 2.159(3)  |
| Co(2)-O(5)#4         | 2.161(4)   |                      |           |
|                      |            | <b>2</b>             |           |
| Cu(1)-O(5)#1         | 2.005(2)   | Cu(1)-O(6)#2         | 2.004(2)  |
| Cu(1)-O(2)#3         | 2.017(2)   | Cu(1)-O(1)           | 2.028(2)  |
| Cu(1)-O(4)#4         | 2.199(2)   | Cu(1)-Cu(1)#3        | 2.7226(7) |
| O(5)#1-Cu(1)-O(6)#2  | 166.84(10) | O(5)#1-Cu(1)-O(2)#3  | 87.78(11) |
| O(6)#2-Cu(1)-O(2)#3  | 90.63(10)  | O(5)#1-Cu(1)-O(1)    | 91.69(10) |
| O(6)#2-Cu(1)-O(1)    | 86.98(10)  | O(2)#3-Cu(1)-O(1)    | 167.26(9) |
| O(5)#1-Cu(1)-O(4)#4  | 99.78(9)   | O(6)#2-Cu(1)-O(4)#4  | 93.36(9)  |
| O(2)#3-Cu(1)-O(4)#4  | 93.52(9)   | O(1)-Cu(1)-O(4)#4    | 99.11(9)  |
| O(5)#1-Cu(1)-Cu(1)#3 | 77.45(7)   | O(6)#2-Cu(1)-Cu(1)#3 | 89.38(7)  |
| O(2)#3-Cu(1)-Cu(1)#3 | 83.53(7)   | O(1)-Cu(1)-Cu(1)#3   | 83.93(7)  |
| O(4)#4-Cu(1)-Cu(1)#3 | 176.00(7)  |                      |           |

Symmetry transformations used to generate equivalent atoms: For compound **1**: #1 -x+5/3, -y+1/3, -z+4/3; #2: y+1/3, -x+y+2/3, -z+2/3; #3: -y+4/3, x-y-1/3, z+2/3; #4: x-y, x-1, -z+1; #5: -x+y+5/3, -x+4/3, z+1/3; #6: y+1, -x+y+1, -z+2. For compound **2**: #1: -x+y-1/3, -x+1/3, z-2/3; #2: x-y+2/3, x+1/3, -z+1/3; #3: -x+1/3, -y+2/3, -z-1/3; #4: -y+1/3, x-y+2/3, z-1/3.

**Table S2** The gas adsorption capacities of MOFs based on H<sub>3</sub>BPT ligand.

| compounds                                                                                | BET / Langmuir surface area [m <sup>2</sup> g <sup>-1</sup> ] | CO <sub>2</sub> uptake at [cm <sup>3</sup> g <sup>-1</sup> ] | H <sub>2</sub> uptake at 77K | Refs |
|------------------------------------------------------------------------------------------|---------------------------------------------------------------|--------------------------------------------------------------|------------------------------|------|
| Mg <sub>3</sub> (BPT) <sub>2</sub> (H <sub>2</sub> O) <sub>4</sub>                       | 714/837                                                       | —                                                            | 1.3 wt%                      | 26a  |
| <b>porph@MOM-11</b>                                                                      | 997/1096                                                      | 90.2/273K                                                    | 1.40 wt%                     | 26b  |
| <b>Porph(Cl<sup>-</sup>)@MOM-11-(Na<sup>+</sup>)</b>                                     | 965/1077                                                      | 96.9/273K                                                    | 1.46 wt%                     | 26b  |
| <b>Porph(Cl<sup>-</sup>)@MOM-11-(Ba<sup>2+</sup>)</b>                                    | 919/1020                                                      | 92.5/273K                                                    | 1.38 wt%                     | 26b  |
| <b>Porph(Cl<sup>-</sup>)@MOM-11-(Cd<sup>2+</sup>)</b>                                    | 893/995                                                       | 84.5/273K                                                    | 1.33 wt%                     | 26b  |
| <b>Porph(Cl<sup>-</sup>)@MOM-11-(Mn<sup>2+</sup>)</b>                                    | 995/1077                                                      | 96.4/273K                                                    | 1.58 wt%                     | 26b  |
| Yb(BPT)(H <sub>2</sub> O)·(DMF) <sub>1.5</sub> (H <sub>2</sub> O) <sub>1.25</sub>        | 515.6                                                         | 16.7/296K                                                    | —                            | 26c  |
| Cu <sub>3</sub> (C <sub>15</sub> H <sub>7</sub> O <sub>6</sub> ) <sub>2</sub> (UMCM-150) | 2300/3100                                                     | —                                                            | 2.1 wt%                      | 26d  |
| <b>porph@MOM-10</b>                                                                      | 1158/1309                                                     | —                                                            | 1.30 wt%                     | 26e  |
| <b>Mnporph@MOM-10-Mn</b>                                                                 | 1140/1282                                                     | —                                                            | 1.58 wt%                     | 26e  |
| <b>Cuporph@MOM-10-CdCu</b>                                                               | 290/332                                                       | —                                                            | 0.42 wt%                     | 26e  |
| <b>porph@MOM-11 (P11)</b>                                                                | 997/1096                                                      | 93/273K                                                      | —                            | 26f  |
| <b>P11-Cu</b>                                                                            | 1251/1406                                                     | 92/273K                                                      | —                            | 26f  |

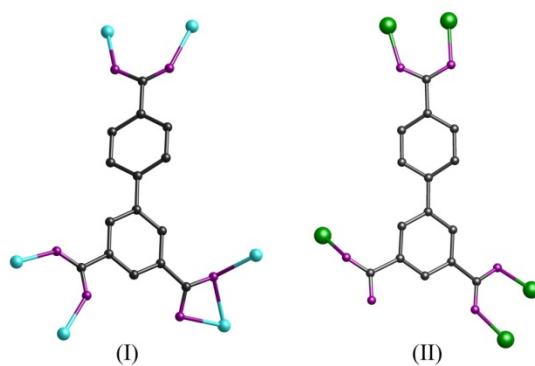

**Fig. S1** The two coordination modes of BPT<sup>3-</sup>ligand in **1** and **2**.

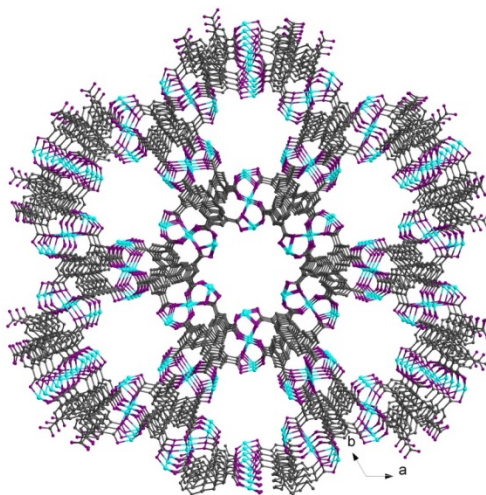

**Fig. S2** View of the 3D framework constructed by [Co<sub>3</sub>(BPT)<sub>2</sub>] units with showing the 1D hexagonal channels.

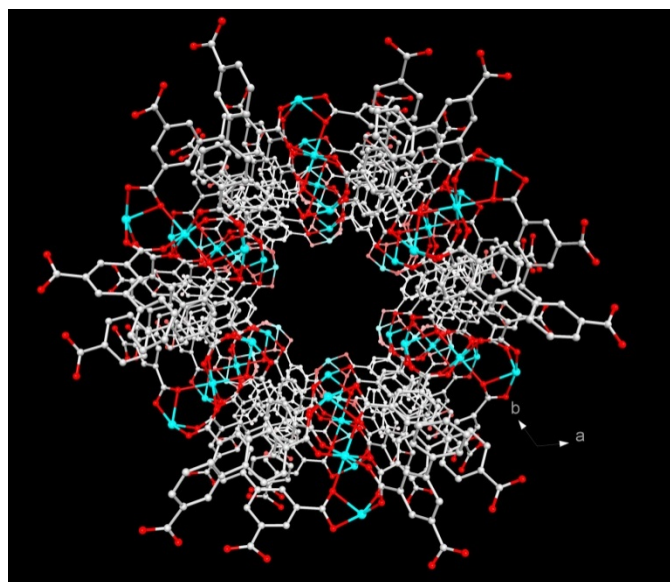

Fig. S3 Projection view of the 1D pore in **1**.

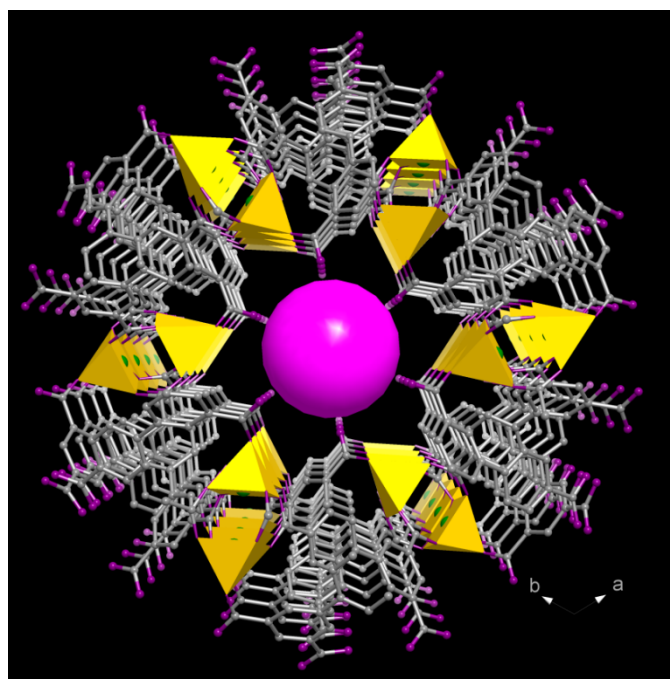

Fig. S4 View of 1D hydrophilic channel in **2** along the *c*-direction.

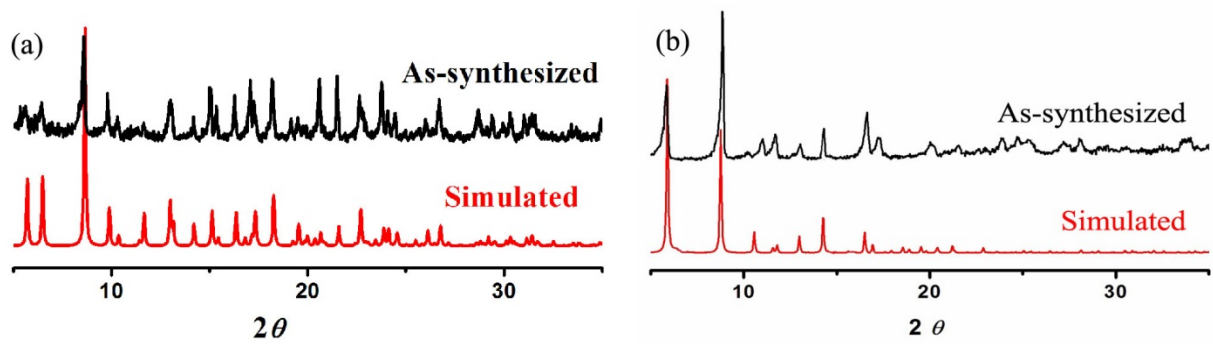

Fig. S5 The PXRD patterns of compound 1 and 2 (a for 1, b for 2).

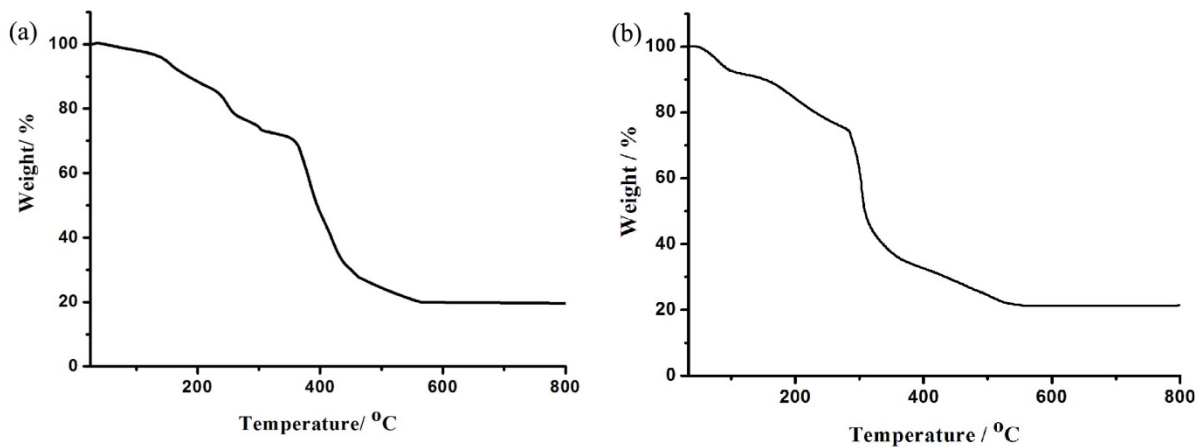

Fig. S6 Thermogravimetric curve of compound 1 and 2 (a for 1, b for 2).

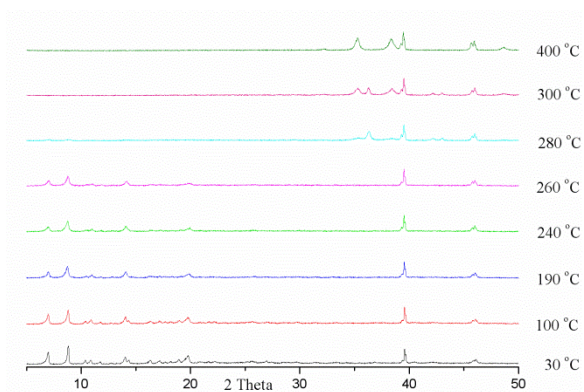

Fig. S7 The temperature-dependent PXRD patterns of 2.

## Photocatalytic experiments

The band gap sizes of polymer were investigated by UV-vis diffuse reflection measurement method at room temperature. The results give an  $E_g$  (band gap energy) value of 2.10 eV (Fig. S8, ESI†). The photocatalytic activities of compound **1** were further studied. The  $\alpha h\nu^2$  vs  $h\nu$  curves for products are shown in Figure S. According to the equation  $(\alpha h\nu)^2 = K(h\nu - E_g)$  (where  $\alpha$  is the absorption coefficient,  $h\nu$  is the discrete photo energy,  $K$  is a constant, and  $E_g$  is the band gap energy), the extrapolated value (the straight lines to the x axis) of  $h\nu$  at  $\alpha = 0$  give absorption edge energies corresponding to  $E_g = 2.10$  eV for the compound.<sup>1,2</sup>

## Possible photocatalytic reaction mechanism

As mentioned in the literature, the photocatalytic mechanism is deduced as follows: because the HOMO is mainly contributed by oxygen and (or) nitrogen 2p bonding orbitals (valence band, VB) and the LUMO by empty transition metal orbitals (conduction band, CB). Under visible light irradiation, the electrons ( $e^-$ ) were excited from the valence band (VB) to the conduction band (CB). The same number of holes ( $h^+$ ) that have oxidation remained in the valence band. Furthermore,  $O_2$  or hydroxyl ( $OH^-$ ) adsorbed on the surfaces of complexes could interact with the electrons ( $e^-$ ) on the CB or the hole ( $h^+$ ) on the VB, respectively, which probably formed the hydroxyl radicals ( $\cdot OH$ ). Later on, the  $\cdot OH$  radicals could degrade the organic dye effectively to accomplish the photocatalytic process.<sup>3-5</sup>

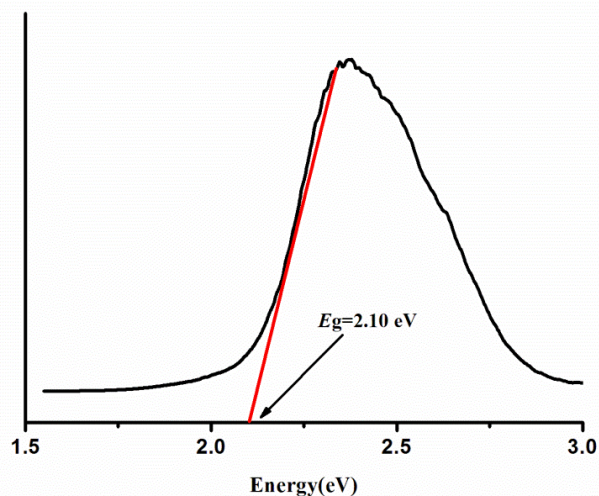

Fig. S8 The  $\alpha h\nu^2$  vs  $h\nu$  curve of **1**.

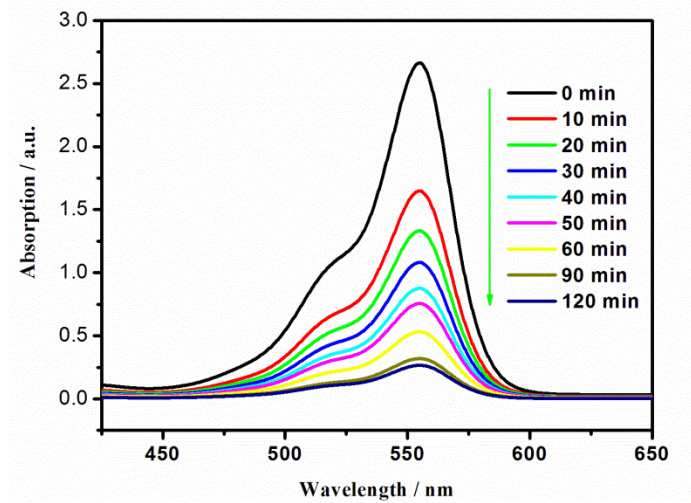

**Fig. S9** Absorption spectra of the RhB solution during the decomposition reaction under visible-light irradiation with the use of compound **1** and  $\text{H}_2\text{O}_2$ .

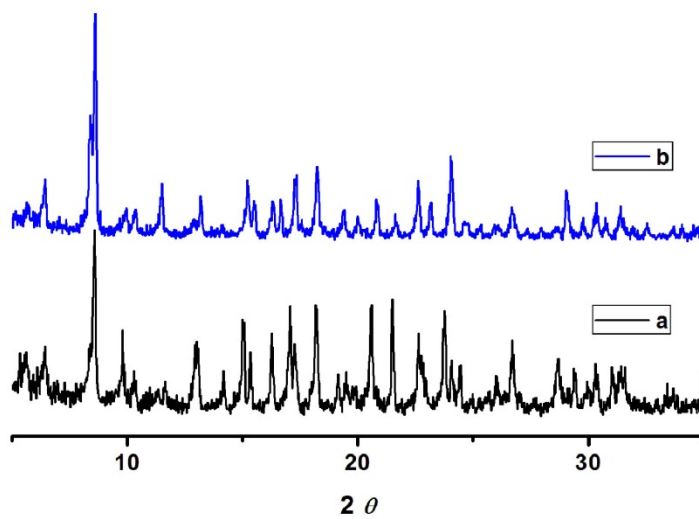

**Fig. S10** The PXRD patterns of **1** (a for as-synthesized, b for after the photocatalytic experiment).

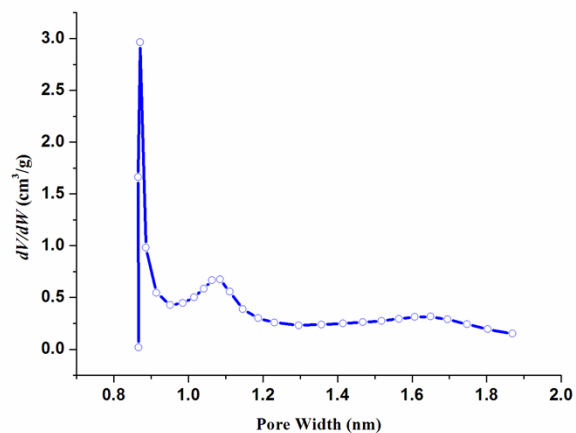

**Fig.S11** Pore size distribution based on Horvath-Kawazoe (H-K) model in **2**.

### References:

- 1 S. Tsunekawa, T. Fukuda and A. Kasuya, *J. Appl. Phys.*, 2000, **87**, 1318.
- 2 A. L. Linsebigler, G. Q. Lu and J. T. Yates, *Chem. Rev.*, 1995, **95**, 735.
- 3 F. Wang, Z. S. liu, H. Yang, Y. X. Tan, J. Zhang, *Angew. Chem., Int. Ed.*, 2011, **50**, 450.
- 4 L. L. Wen, L. Zhou, B. G. Zhang, X. G. Meng, H. Qu and D. F. Li, *J. Mater. Chem.*, 2012, **22**, 22603.
- 5 T. Wen, D. X. Zhang, J. Liu, R. Lin and J. Zhang, *Chem. Commun.*, 2013, **49**, 5660.
